# Supplementary material for: Investigation of sublimation with and without dissociation in the chloride and nitrate salts of 4-(1-hydroxy-1,2-diphenylethyl)pyridine
Source: Royal Society of Chemistry journal article supplement (doi:10.1039/b9nj00411d), 2009-12-08
Supplement: b9nj00411d.pdf [file b9nj00411d.pdf]

=====

S U P P L E M E N T A R Y   M A T E R I A L

=====

B E L O N G I N G   T O   T H E   P A P E R

## Investigation of sublimation with and without dissociation in the chloride and nitrate salts of 4-(1-hydroxy-1,2-diphenylethyl)pyridine.

Nikoletta B Báthori <sup>a\*</sup>, Petra Bombicz <sup>b</sup>, Susan A Bourne <sup>a\*</sup> and Gerhard A Venter <sup>a</sup>

<sup>a</sup> Department of Chemistry, University of Cape Town, Rondebosch 7701, South Africa, <sup>b</sup> Institute of Structural Chemistry, Hungarian Academy of Sciences, Pusztaszeri út 59-67, Budapest, Hungary. E-mail: nikoletta.bathori@uct.ac.za, susan.bourne@uct.ac.za

### C o n t e n t s

=====

#### Results of analytical measurements:

Figure 1 - TG curves of investigated compounds.

Figure 2 - Calculated and measured PXRD traces of 1, 1H<sup>+</sup>.Cl<sup>-</sup> and 1H<sup>+</sup>.NO<sub>3</sub><sup>-</sup>.

Figure 3 - Fitted packing diagrams of sublimed crystals of 1H<sup>+</sup>.NO<sub>3</sub><sup>-</sup>.

Table I. - Cell parameters of sublimed crystal of 1H<sup>+</sup>.NO<sub>3</sub><sup>-</sup>.

#### Crystallographic information of compound 1:

Table 1 - Crystal Data and Details of the Structure Determination of 1.

Table 2 - Final Coordinates and Equivalent Isotropic Displacement Parameters of the non-Hydrogen atoms of 1.

Table 3 - Hydrogen Atom Positions and Isotropic Displacement Parameters of 1.

Table 4 - (An)isotropic Displacement Parameters of 1.

Table 5 - Bond Distances (Angstrom) of 1.

Table 6 - Bond Angles (Degrees) of 1.

Table 7 - Torsion Angles (Degrees) of 1.

Table 8 - Contact Distances (Angstrom) of 1.

Table 9 - Hydrogen Bonds (Angstrom, Deg) of 1.

#### Crystallographic information of compound 1H<sup>+</sup>.Cl<sup>-</sup>:

Table 10 - Crystal Data and Details of the Structure Determination of 1H<sup>+</sup>.Cl<sup>-</sup>.

Table 11 - Final Coordinates and Equivalent Isotropic Displacement Parameters of the non-Hydrogen atoms 1H<sup>+</sup>.Cl<sup>-</sup>.

Table 12 - Hydrogen Atom Positions and Isotropic Displacement Parameters of 1H<sup>+</sup>.Cl<sup>-</sup>.

Table 13 - (An)isotropic Displacement Parameters of 1H<sup>+</sup>.Cl<sup>-</sup>.

Table 14 - Bond Distances (Angstrom) of 1H<sup>+</sup>.Cl<sup>-</sup>.

Table 15 - Bond Angles (Degrees) of 1H<sup>+</sup>.Cl<sup>-</sup>.

Table 16 - Torsion Angles (Degrees) of 1H<sup>+</sup>.Cl<sup>-</sup>.

Table 17 - Contact Distances (Angstrom) of 1H<sup>+</sup>.Cl<sup>-</sup>.

Table 18 - Hydrogen Bonds (Angstrom, Deg) of 1H<sup>+</sup>.Cl<sup>-</sup>.

#### Crystallographic information of compound 1H<sup>+</sup>.NO<sub>3</sub><sup>-</sup>:

Table 19 - Crystal Data and Details of the Structure Determination of 1H<sup>+</sup>.NO<sub>3</sub><sup>-</sup>.

Table 20 - Final Coordinates and Equivalent Isotropic Displacement of 1H<sup>+</sup>.NO<sub>3</sub><sup>-</sup>.

Table 21 - Hydrogen Atom Positions and Isotropic Displacement Parameters of 1H<sup>+</sup>.NO<sub>3</sub><sup>-</sup>.

Table 22 - (An)isotropic Displacement Parameters of 1H<sup>+</sup>.NO<sub>3</sub><sup>-</sup>.

Table 23 - Bond Distances (Angstrom) of 1H<sup>+</sup>.NO<sub>3</sub><sup>-</sup>.

Table 24 - Bond Angles (Degrees) of 1H<sup>+</sup>.NO<sub>3</sub><sup>-</sup>.

Table 25 - Torsion Angles (Degrees) of 1H<sup>+</sup>.NO<sub>3</sub><sup>-</sup>.

Table 26 - Contact Distances (Angstrom) of 1H<sup>+</sup>.NO<sub>3</sub><sup>-</sup>.

Table 27 - Hydrogen Bonds (Angstrom, Deg) of 1H<sup>+</sup>.NO<sub>3</sub><sup>-</sup>.

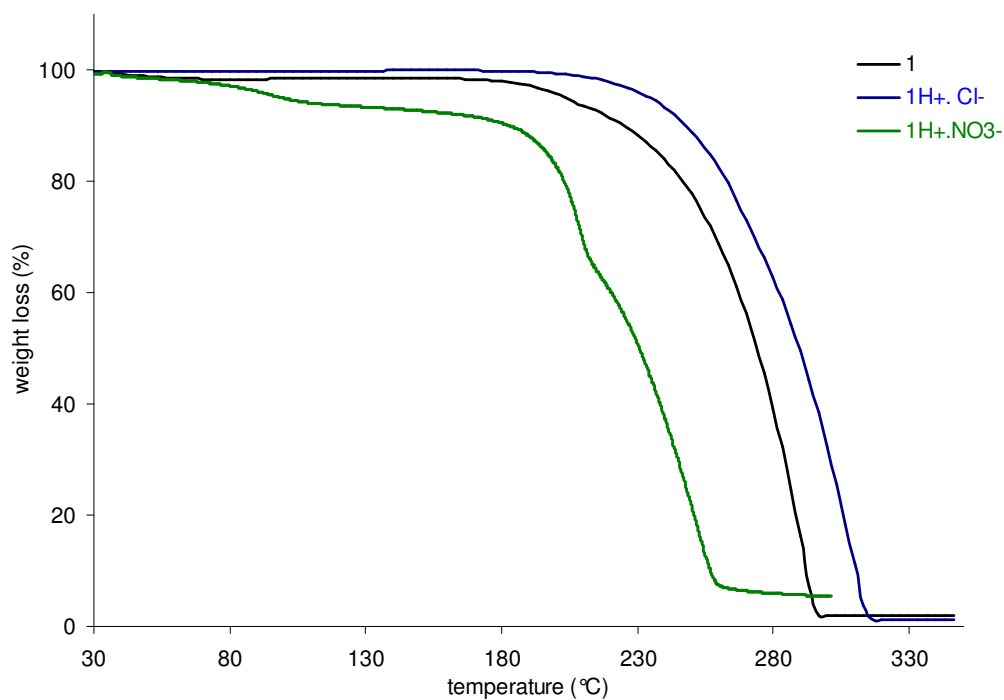

**Figure 1** TGA results of compounds **1**,  $1\text{H}^+\cdot\text{Cl}^-$  and  $1\text{H}^+\cdot\text{NO}_3^-$  and the first derivative curve of  $1\text{H}^+\cdot\text{NO}_3^-$  to clarify the weight loss calculation.

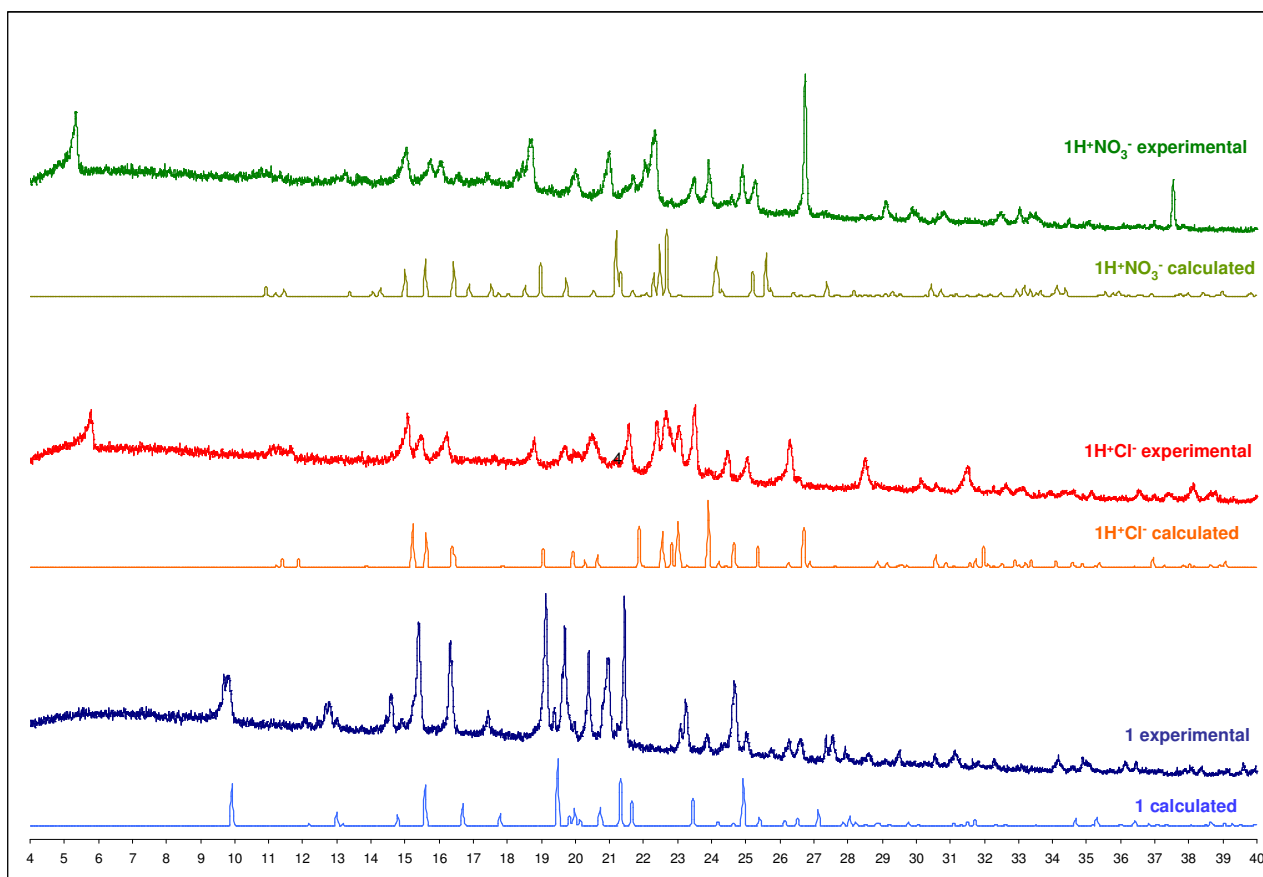

**Figure 2** Calculated and measured PXRD traces of **1**,  $1\text{H}^+\cdot\text{Cl}^-$  and  $1\text{H}^+\cdot\text{NO}_3^-$ . The peak positions are shifted owing to the different temperatures at which the measured sample was done compared to the calculated pattern. The peak intensities vary, perhaps due to microcrystalline orientation and/or texture effects.

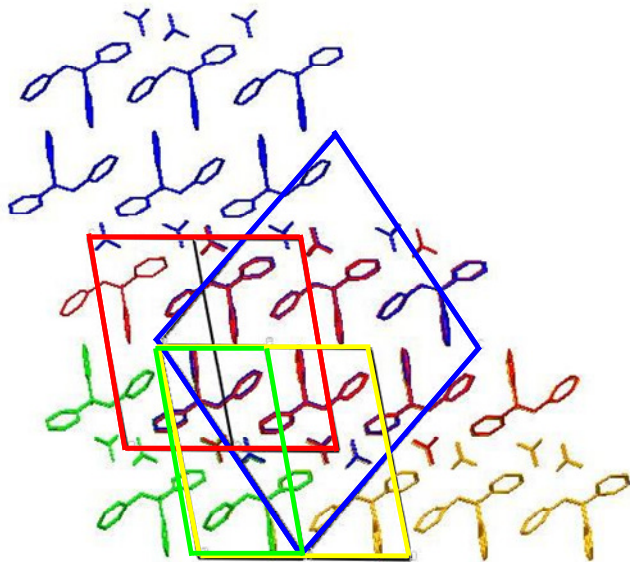

**Figure 3** Fitted packing diagrams of sublimed crystals of  $1\text{H}^+.\text{NO}_3^-$ .

**Table I.** Cell parameters of sublimed crystal of  $1\text{H}^+.\text{NO}_3^-$ .

|                             | <b>A</b>      | <b>B</b>    | <b>C</b>             | <b>D</b>   |
|-----------------------------|---------------|-------------|----------------------|------------|
| <i>Space group</i>          | P-1           | P-1         | P-1                  | P-1        |
| <i>a</i> (Å)                | 6.3168 (13)   | 9.3876(15)  | 6.3314(12)           | 6.3230(13) |
| <i>b</i> (Å)                | 8.1971(16)    | 16.285(3)   | 19.743(3)            | 16.379(4)  |
| <i>c</i> (Å)                | 16.479(3)     | 16.479(3)   | 20.854(4)            | 16.449(5)  |
| $\alpha$ (°)                | 100.78(3)     | 94.54(7)    | 73.17(3)             | 100.84(2)  |
| $\beta$ (°)                 | 91.20(3)      | 100.359(12) | 81.74(3)             | 91.419(15) |
| $\gamma$ (°)                | 100.44(3)     | 91.385(12)  | 86.66(1)             | 100.64(2)  |
| <i>V</i> (Å <sup>3</sup> )  | 823.9(3)      | 2468.6(8)   | 2468.9(8)            | 1641.3(8)  |
| <i>Z</i>                    | 2             | 6           | 6                    | 4          |
| <i>colour code on Fig.3</i> | green         | blue        | red                  | yellow     |
| <i>comment</i>              | original cell |             | same structures as A |            |

**Table 1 - Crystal Data and Details of the Structure Determination of 1.**

| Crystal Data                           |            |           |                             |                        |
|----------------------------------------|------------|-----------|-----------------------------|------------------------|
| Formula                                |            |           | C19                         | H17 N O                |
| Formula Weight                         |            |           |                             | 275.34                 |
| Crystal System                         |            |           |                             | Monoclinic             |
| Space group                            |            | P21/c     |                             | (No. 14)               |
| a, b, c [Angstrom]                     | 9.3446(19) | 10.612(2) |                             | 15.267(3)              |
| alpha, beta, gamma [deg]               |            | 90        | 107.70(3)                   | 90                     |
| V [Ang**3]                             |            |           |                             | 1442.3(5)              |
| Z                                      |            |           |                             | 4                      |
| D(calc) [g/cm**3]                      |            |           |                             | 1.268                  |
| Mu(MoKa) [ /mm ]                       |            |           |                             | 0.078                  |
| F(000)                                 |            |           |                             | 584                    |
| Crystal Size [mm]                      |            |           | 0.01 x                      | 0.01 x 0.01            |
| Data Collection                        |            |           |                             |                        |
| Temperature (K)                        |            |           |                             | 173                    |
| Radiation [Angstrom]                   |            | MoKa      |                             | 0.71073                |
| Theta Min-Max [Deg]                    |            |           |                             | 2.4, 26.0              |
| Dataset                                |            |           | -11: 11 ; -13: 13 ; -18: 18 |                        |
| Tot., Uniq. Data, R(int)               |            |           | 30355, 2835,                | 0.067                  |
| Observed data [I > 2.0 sigma(I)]       |            |           |                             | 2129                   |
| Refinement                             |            |           |                             |                        |
| Nref, Npar                             |            |           |                             | 2835, 192              |
| R, wR2, S                              |            |           | 0.0370, 0.0932,             | 1.04                   |
| w = 1/[\s^2(Fo^2)+(0.0485P)^2+0.1690P] |            |           |                             | where P=(Fo^2+2Fc^2)/3 |
| Max. and Av. Shift/Error               |            |           |                             | 0.00, 0.00             |
| Min. and Max. Resd. Dens. [e/Ang^3]    |            |           |                             | -0.19, 0.17            |

**Table 2 - Final Coordinates and Equivalent Isotropic Displacement Parameters of the non-Hydrogen atoms of 1.**

| Atom | x            | y           | z           | U(eq) [Ang^2] |
|------|--------------|-------------|-------------|---------------|
| ---- | ----         | ----        | ----        | -----         |
| O8   | 0.37336(9)   | 0.18173(8)  | 0.38465(6)  | 0.0212(3)     |
| N1   | 0.41716(12)  | 0.28226(10) | 0.07606(7)  | 0.0257(3)     |
| C2   | 0.53275(14)  | 0.33874(13) | 0.13733(9)  | 0.0257(4)     |
| C3   | 0.55435(13)  | 0.33791(12) | 0.23096(9)  | 0.0231(4)     |
| C4   | 0.45363(13)  | 0.27399(11) | 0.26575(8)  | 0.0188(4)     |
| C5   | 0.33489(14)  | 0.21305(12) | 0.20290(9)  | 0.0238(4)     |
| C6   | 0.32128(14)  | 0.22005(12) | 0.11040(9)  | 0.0262(4)     |
| C7   | 0.46825(13)  | 0.27833(11) | 0.36775(8)  | 0.0185(3)     |
| C9   | 0.41213(13)  | 0.40903(11) | 0.38954(9)  | 0.0206(4)     |
| C10  | 0.25194(13)  | 0.43990(11) | 0.33521(8)  | 0.0212(4)     |
| C11  | 0.22223(15)  | 0.53026(12) | 0.26623(9)  | 0.0281(4)     |
| C12  | 0.07553(16)  | 0.56137(14) | 0.21641(10) | 0.0346(5)     |
| C13  | -0.04380(15) | 0.50245(14) | 0.23480(10) | 0.0344(5)     |
| C14  | -0.01642(14) | 0.41260(14) | 0.30320(10) | 0.0328(5)     |
| C15  | 0.13010(13)  | 0.38154(13) | 0.35305(9)  | 0.0267(4)     |
| C16  | 0.63064(13)  | 0.25196(11) | 0.42695(8)  | 0.0195(4)     |
| C17  | 0.73016(14)  | 0.34427(13) | 0.47395(9)  | 0.0253(4)     |
| C18  | 0.87292(14)  | 0.31219(13) | 0.53063(10) | 0.0304(4)     |
| C19  | 0.91850(15)  | 0.18829(13) | 0.54090(9)  | 0.0295(4)     |
| C20  | 0.82145(14)  | 0.09557(13) | 0.49332(9)  | 0.0300(4)     |
| C21  | 0.67950(14)  | 0.12724(12) | 0.43704(9)  | 0.0256(4)     |

U(eq) = 1/3 of the trace of the orthogonalized U Tensor

**Table 3 - Hydrogen Atom Positions and Isotropic Displacement Parameters of 1.**

| Atom | x    | y       | z       | U(iso) [Ang^2]   |
|------|------|---------|---------|------------------|
| ---- | ---- | ----    | ----    | -----            |
| H2   |      | 0.60400 | 0.38180 | 0.11530 0.0310   |
| H3   |      | 0.63770 | 0.38080 | 0.27140 0.0280   |
| H5   |      | 0.26370 | 0.16700 | 0.22320 0.0290   |
| H6   |      | 0.23880 | 0.17810 | 0.06840 0.0310   |
| H8   |      | 0.38850 | 0.18870 | 0.45000 0.059(5) |
| H9A  |      | 0.47870 | 0.47490 | 0.37750 0.0250   |

|     |          |         |         |        |
|-----|----------|---------|---------|--------|
| H9B | 0.42140  | 0.41220 | 0.45590 | 0.0250 |
| H11 | 0.30340  | 0.57150 | 0.25290 | 0.0340 |
| H12 | 0.05740  | 0.62350 | 0.16950 | 0.0420 |
| H13 | -0.14400 | 0.52360 | 0.20060 | 0.0410 |
| H14 | -0.09810 | 0.37180 | 0.31630 | 0.0390 |
| H15 | 0.14760  | 0.31960 | 0.40000 | 0.0320 |
| H17 | 0.70050  | 0.43020 | 0.46740 | 0.0300 |
| H18 | 0.93940  | 0.37640 | 0.56250 | 0.0360 |
| H19 | 1.01540  | 0.16660 | 0.58020 | 0.0350 |
| H20 | 0.85240  | 0.00990 | 0.49930 | 0.0360 |
| H21 | 0.61420  | 0.06270 | 0.40470 | 0.0310 |

=====  
The Temperature Factor has the Form of  $\text{Exp}(-T)$  Where  
 $T = 8 * (\text{Pi}^{**2}) * U * (\text{Sin}(\text{Theta}) / \text{Lambda})^{**2}$  for Isotropic Atoms

**Table 4 - (An)isotropic Displacement Parameters of 1.**

| Atom | U(1,1) or U | U(2,2)    | U(3,3)    | U(2,3)     | U(1,3)     | U(1,2)     |
|------|-------------|-----------|-----------|------------|------------|------------|
| O8   | 0.0218(5)   | 0.0240(5) | 0.0183(5) | -0.0005(4) | 0.0069(4)  | -0.0048(3) |
| N1   | 0.0274(6)   | 0.0310(6) | 0.0197(6) | 0.0004(5)  | 0.0087(5)  | 0.0050(5)  |
| C2   | 0.0244(7)   | 0.0312(7) | 0.0238(7) | 0.0036(6)  | 0.0106(6)  | 0.0004(6)  |
| C3   | 0.0200(6)   | 0.0272(7) | 0.0214(7) | 0.0006(5)  | 0.0054(5)  | -0.0008(5) |
| C4   | 0.0183(6)   | 0.0197(6) | 0.0186(7) | 0.0005(5)  | 0.0058(5)  | 0.0043(5)  |
| C5   | 0.0245(7)   | 0.0270(7) | 0.0204(7) | -0.0029(5) | 0.0077(5)  | -0.0039(5) |
| C6   | 0.0259(7)   | 0.0307(7) | 0.0201(7) | -0.0039(5) | 0.0044(5)  | -0.0012(6) |
| C7   | 0.0180(6)   | 0.0212(6) | 0.0166(6) | -0.0012(5) | 0.0058(5)  | -0.0023(5) |
| C9   | 0.0204(6)   | 0.0224(7) | 0.0188(6) | -0.0030(5) | 0.0059(5)  | -0.0018(5) |
| C10  | 0.0224(6)   | 0.0219(6) | 0.0186(7) | -0.0055(5) | 0.0050(5)  | 0.0017(5)  |
| C11  | 0.0315(7)   | 0.0252(7) | 0.0276(7) | 0.0000(6)  | 0.0091(6)  | 0.0031(6)  |
| C12  | 0.0406(8)   | 0.0328(8) | 0.0265(8) | 0.0030(6)  | 0.0044(6)  | 0.0130(6)  |
| C13  | 0.0264(7)   | 0.0405(9) | 0.0296(8) | -0.0108(7) | -0.0016(6) | 0.0121(6)  |
| C14  | 0.0214(7)   | 0.0402(9) | 0.0360(9) | -0.0071(7) | 0.0074(6)  | 0.0007(6)  |
| C15  | 0.0232(7)   | 0.0303(8) | 0.0265(8) | -0.0007(6) | 0.0075(6)  | 0.0021(5)  |
| C16  | 0.0207(6)   | 0.0251(7) | 0.0138(6) | -0.0008(5) | 0.0069(5)  | 0.0005(5)  |
| C17  | 0.0240(7)   | 0.0245(7) | 0.0254(7) | -0.0026(6) | 0.0047(5)  | 0.0019(5)  |
| C18  | 0.0233(7)   | 0.0350(8) | 0.0289(8) | -0.0073(6) | 0.0020(6)  | -0.0021(6) |
| C19  | 0.0219(7)   | 0.0387(8) | 0.0253(8) | 0.0024(6)  | 0.0033(6)  | 0.0058(6)  |
| C20  | 0.0282(7)   | 0.0283(7) | 0.0335(8) | 0.0031(6)  | 0.0092(6)  | 0.0065(6)  |
| C21  | 0.0250(7)   | 0.0244(7) | 0.0265(7) | -0.0024(6) | 0.0067(5)  | 0.0003(5)  |

=====  
The Temperature Factor has the Form of  $\text{Exp}(-T)$  Where  
 $T = 8 * (\text{Pi}^{**2}) * U * (\text{Sin}(\text{Theta}) / \text{Lambda})^{**2}$  for Isotropic Atoms  
 $T = 2 * (\text{Pi}^{**2}) * \text{Sum}_{ij} (h(i) * h(j) * U(i, j) * \text{Astar}(i) * \text{Astar}(j))$ , for  
Anisotropic Atoms. Astar(i) are Reciprocal Axial Lengths and  
h(i) are the Reflection Indices.

**Table 5 - Bond Distances (Angstrom) of 1.**

|    |      |            |     |      |            |
|----|------|------------|-----|------|------------|
| O8 | -C7  | 1.4293(15) | C17 | -C18 | 1.394(2)   |
| O8 | -H8  | 0.9700     | C18 | -C19 | 1.376(2)   |
| N1 | -C6  | 1.3413(18) | C19 | -C20 | 1.385(2)   |
| N1 | -C2  | 1.3366(17) | C20 | -C21 | 1.3848(19) |
| C2 | -C3  | 1.3816(19) | C2  | -H2  | 0.9500     |
| C3 | -C4  | 1.3900(18) | C3  | -H3  | 0.9500     |
| C4 | -C7  | 1.5220(17) | C5  | -H5  | 0.9500     |
| C4 | -C5  | 1.3866(18) | C6  | -H6  | 0.9500     |
| C5 | -C6  | 1.3809(19) | C9  | -H9A | 0.9900     |
| C7 | -C16 | 1.5375(18) | C9  | -H9B | 0.9900     |
| C7 | -C9  | 1.5542(17) | C11 | -H11 | 0.9500     |
| C9 | -C10 | 1.5103(18) | C12 | -H12 | 0.9500     |

|     |      |            |     |      |        |
|-----|------|------------|-----|------|--------|
| C10 | -C11 | 1.3885(18) | C13 | -H13 | 0.9500 |
| C10 | -C15 | 1.3938(18) | C14 | -H14 | 0.9500 |
| C11 | -C12 | 1.390(2)   | C15 | -H15 | 0.9500 |
| C12 | -C13 | 1.380(2)   | C17 | -H17 | 0.9500 |
| C13 | -C14 | 1.379(2)   | C18 | -H18 | 0.9500 |
| C14 | -C15 | 1.3888(19) | C19 | -H19 | 0.9500 |
| C16 | -C21 | 1.3933(18) | C20 | -H20 | 0.9500 |
| C16 | -C17 | 1.3905(18) | C21 | -H21 | 0.9500 |

**Table 6 – Bond Angles (Degrees) of 1.**

|     |      |      |            |     |      |      |            |
|-----|------|------|------------|-----|------|------|------------|
| C7  | -O8  | -H8  | 103.00     | C17 | -C18 | -C19 | 120.58(13) |
| C2  | -N1  | -C6  | 116.16(11) | C18 | -C19 | -C20 | 119.24(13) |
| N1  | -C2  | -C3  | 123.64(13) | C19 | -C20 | -C21 | 120.27(13) |
| C2  | -C3  | -C4  | 119.71(12) | C16 | -C21 | -C20 | 121.27(12) |
| C3  | -C4  | -C7  | 121.04(11) | N1  | -C2  | -H2  | 118.00     |
| C5  | -C4  | -C7  | 121.75(12) | C3  | -C2  | -H2  | 118.00     |
| C3  | -C4  | -C5  | 117.10(12) | C2  | -C3  | -H3  | 120.00     |
| C4  | -C5  | -C6  | 119.22(13) | C4  | -C3  | -H3  | 120.00     |
| N1  | -C6  | -C5  | 124.16(13) | C4  | -C5  | -H5  | 120.00     |
| O8  | -C7  | -C4  | 107.18(10) | C6  | -C5  | -H5  | 120.00     |
| O8  | -C7  | -C16 | 108.60(10) | N1  | -C6  | -H6  | 118.00     |
| C4  | -C7  | -C9  | 108.35(10) | C5  | -C6  | -H6  | 118.00     |
| C4  | -C7  | -C16 | 111.19(11) | C7  | -C9  | -H9A | 109.00     |
| C9  | -C7  | -C16 | 111.94(10) | C7  | -C9  | -H9B | 109.00     |
| O8  | -C7  | -C9  | 109.46(10) | C10 | -C9  | -H9A | 109.00     |
| C7  | -C9  | -C10 | 114.75(11) | C10 | -C9  | -H9B | 109.00     |
| C9  | -C10 | -C11 | 120.17(12) | H9A | -C9  | -H9B | 108.00     |
| C11 | -C10 | -C15 | 117.92(12) | C10 | -C11 | -H11 | 119.00     |
| C9  | -C10 | -C15 | 121.90(11) | C12 | -C11 | -H11 | 119.00     |
| C10 | -C11 | -C12 | 121.03(13) | C11 | -C12 | -H12 | 120.00     |
| C11 | -C12 | -C13 | 120.30(14) | C13 | -C12 | -H12 | 120.00     |
| C12 | -C13 | -C14 | 119.47(14) | C12 | -C13 | -H13 | 120.00     |
| C13 | -C14 | -C15 | 120.26(13) | C14 | -C13 | -H13 | 120.00     |
| C10 | -C15 | -C14 | 121.01(13) | C13 | -C14 | -H14 | 120.00     |
| C7  | -C16 | -C17 | 124.11(11) | C15 | -C14 | -H14 | 120.00     |
| C17 | -C16 | -C21 | 117.83(12) | C10 | -C15 | -H15 | 119.00     |
| C7  | -C16 | -C21 | 118.01(11) | C14 | -C15 | -H15 | 120.00     |
| C16 | -C17 | -C18 | 120.80(13) | C16 | -C17 | -H17 | 120.00     |
| C18 | -C17 | -H17 | 120.00     | C19 | -C20 | -H20 | 120.00     |
| C17 | -C18 | -H18 | 120.00     | C21 | -C20 | -H20 | 120.00     |
| C19 | -C18 | -H18 | 120.00     | C16 | -C21 | -H21 | 119.00     |
| C18 | -C19 | -H19 | 120.00     | C20 | -C21 | -H21 | 119.00     |
| C20 | -C19 | -H19 | 120.00     |     |      |      |            |

**Table 7 – Torsion Angles (Degrees) of 1.**

|     |     |     |      |             |
|-----|-----|-----|------|-------------|
| C6  | -N1 | -C2 | -C3  | -1.5(2)     |
| C2  | -N1 | -C6 | -C5  | 0.8(2)      |
| N1  | -C2 | -C3 | -C4  | 1.1(2)      |
| C2  | -C3 | -C4 | -C5  | 0.21(19)    |
| C2  | -C3 | -C4 | -C7  | -175.95(12) |
| C3  | -C4 | -C5 | -C6  | -0.90(19)   |
| C7  | -C4 | -C5 | -C6  | 175.24(12)  |
| C3  | -C4 | -C7 | -O8  | -166.52(11) |
| C3  | -C4 | -C7 | -C9  | 75.45(15)   |
| C3  | -C4 | -C7 | -C16 | -47.97(15)  |
| C5  | -C4 | -C7 | -O8  | 17.50(16)   |
| C5  | -C4 | -C7 | -C9  | -100.54(14) |
| C5  | -C4 | -C7 | -C16 | 136.05(12)  |
| C4  | -C5 | -C6 | -N1  | 0.4(2)      |
| O8  | -C7 | -C9 | -C10 | -58.26(13)  |
| C4  | -C7 | -C9 | -C10 | 58.31(14)   |
| C16 | -C7 | -C9 | -C10 | -178.72(10) |

|     |      |      |      |              |
|-----|------|------|------|--------------|
| O8  | -C7  | -C16 | -C17 | -138.48 (12) |
| O8  | -C7  | -C16 | -C21 | 38.96 (15)   |
| C4  | -C7  | -C16 | -C17 | 103.83 (14)  |
| C4  | -C7  | -C16 | -C21 | -78.73 (14)  |
| C9  | -C7  | -C16 | -C17 | -17.52 (17)  |
| C9  | -C7  | -C16 | -C21 | 159.93 (12)  |
| C7  | -C9  | -C10 | -C11 | -108.28 (13) |
| C7  | -C9  | -C10 | -C15 | 72.87 (16)   |
| C9  | -C10 | -C11 | -C12 | -179.01 (12) |
| C15 | -C10 | -C11 | -C12 | -0.11 (19)   |
| C9  | -C10 | -C15 | -C14 | 179.04 (13)  |
| C11 | -C10 | -C15 | -C14 | 0.2 (2)      |
| C10 | -C11 | -C12 | -C13 | 0.0 (2)      |
| C11 | -C12 | -C13 | -C14 | 0.2 (2)      |
| C12 | -C13 | -C14 | -C15 | -0.1 (2)     |
| C13 | -C14 | -C15 | -C10 | -0.1 (2)     |
| C7  | -C16 | -C17 | -C18 | 176.21 (12)  |
| C21 | -C16 | -C17 | -C18 | -1.24 (19)   |
| C7  | -C16 | -C21 | -C20 | -176.43 (12) |
| C17 | -C16 | -C21 | -C20 | 1.18 (19)    |
| C16 | -C17 | -C18 | -C19 | 0.3 (2)      |
| C17 | -C18 | -C19 | -C20 | 0.8 (2)      |
| C18 | -C19 | -C20 | -C21 | -0.8 (2)     |
| C19 | -C20 | -C21 | -C16 | -0.2 (2)     |

**Table 8 - Contact Distances (Angstrom) of 1.**

|     |        |             |     |        |        |
|-----|--------|-------------|-----|--------|--------|
| O8  | .C15   | 3.0380 (17) | C14 | .H18_f | 2.9700 |
| O8  | .N1_b  | 2.8506 (15) | C15 | .H18_f | 3.0300 |
| O8  | .H5    | 2.3700      | C16 | .H3    | 2.7600 |
| O8  | .H21   | 2.5200      | C17 | .H9A   | 2.7400 |
| O8  | .H13_a | 2.7200      | C17 | .H9B   | 2.9000 |
| O8  | .H15   | 2.6400      | C17 | .H3    | 2.9700 |
| N1  | .O8_c  | 2.8506 (15) | C20 | .H12_i | 3.0400 |
| N1  | .C7_c  | 3.4174 (17) | C21 | .H8    | 2.8600 |
| N1  | .H8_c  | 1.8900      | C21 | .H11_i | 3.0100 |
| N1  | .H9B_c | 2.7700      | C21 | .H2_b  | 3.0100 |
| C3  | .C17   | 3.572 (2)   | H2  | .C21_c | 3.0100 |
| C4  | .C11   | 3.4758 (19) | H3  | .C16   | 2.7600 |
| C5  | .C10   | 3.3806 (19) | H3  | .C17   | 2.9700 |
| C7  | .N1_b  | 3.4174 (17) | H3  | .H14_j | 2.3500 |
| C10 | .C5    | 3.3806 (19) | H5  | .O8    | 2.3700 |
| C11 | .C4    | 3.4758 (19) | H5  | .C13_a | 2.9100 |
| C13 | .C19_e | 3.514 (2)   | H5  | .H13_a | 2.3900 |
| C15 | .O8    | 3.0380 (17) | H6  | .H15_c | 2.4500 |
| C17 | .C3    | 3.572 (2)   | H8  | .C21   | 2.8600 |
| C19 | .C13_h | 3.514 (2)   | H8  | .H9B   | 2.3900 |
| C2  | .H21_d | 2.7200      | H8  | .H15   | 2.5600 |
| C2  | .H8_c  | 2.7800      | H8  | .N1_b  | 1.8900 |
| C3  | .H9A   | 2.9300      | H8  | .C2_b  | 2.7800 |
| C6  | .H8_c  | 2.8700      | H8  | .C6_b  | 2.8700 |
| C6  | .H19_e | 3.0000      | H9A | .C3    | 2.9300 |
| C9  | .H9B_f | 3.0600      | H9A | .C17   | 2.7400 |
| C9  | .H17   | 2.6000      | H9A | .H11   | 2.3400 |
| C13 | .H5_g  | 2.9100      | H9A | .H17   | 2.1600 |
| H9B | .C17   | 2.9000      | H15 | .O8    | 2.6400 |
| H9B | .H8    | 2.3900      | H15 | .H8    | 2.5600 |
| H9B | .H17   | 2.5700      | H15 | .H6_b  | 2.4500 |
| H9B | .C9_f  | 3.0600      | H17 | .C9    | 2.6000 |
| H9B | .H9B_f | 2.5000      | H17 | .H9A   | 2.1600 |
| H9B | .H17_f | 2.5100      | H17 | .H9B   | 2.5700 |
| H9B | .N1_b  | 2.7700      | H17 | .H9B_f | 2.5100 |
| H11 | .H9A   | 2.3400      | H18 | .C14_f | 2.9700 |
| H11 | .C21_d | 3.0100      | H18 | .C15_f | 3.0300 |

|     |        |        |     |       |        |
|-----|--------|--------|-----|-------|--------|
| H12 | .C20_d | 3.0400 | H19 | .C6_h | 3.0000 |
| H13 | .O8_g  | 2.7200 | H21 | .O8   | 2.5200 |
| H13 | .H5_g  | 2.3900 | H21 | .C2_i | 2.7200 |
| H14 | .H3_k  | 2.3500 |     |       |        |

**Table 9 - Hydrogen Bonds (Angstrom, Deg) of 1.**

|    |       |       |        |        |            |        |       |
|----|-------|-------|--------|--------|------------|--------|-------|
| O8 | -- H8 | .. N1 | 0.9700 | 1.8900 | 2.8506(15) | 175.00 | 4_555 |
| C5 | -- H5 | .. O8 | 0.9500 | 2.3700 | 2.7079(17) | 100.00 | .     |

- 14 -

**Translation of Symmetry Code to Equiv.Pos. in crystal 1.**

|   |               |                       |
|---|---------------|-----------------------|
| a | = [ 2545.00 ] | = -x, -1/2+y, 1/2-z   |
| b | = [ 4555.00 ] | = x, 1/2-y, 1/2+z     |
| c | = [ 4554.00 ] | = x, 1/2-y, -1/2+z    |
| d | = [ 2655.00 ] | = 1-x, 1/2+y, 1/2-z   |
| e | = [ 4454.00 ] | = -1+x, 1/2-y, -1/2+z |
| f | = [ 3666.00 ] | = 1-x, 1-y, 1-z       |
| g | = [ 2555.00 ] | = -x, 1/2+y, 1/2-z    |
| h | = [ 4655.00 ] | = 1+x, 1/2-y, 1/2+z   |
| i | = [ 2645.00 ] | = 1-x, -1/2+y, 1/2-z  |
| j | = [ 1655.00 ] | = 1+x, y, z           |
| k | = [ 1455.00 ] | = -1+x, y, z          |

**Table 10 - Crystal Data and Details of the Structure Determination of 1H<sup>+</sup>.Cl<sup>-</sup>.**

| Crystal Data                              |            | C19                      | H18       | N       | O | Cl          |
|-------------------------------------------|------------|--------------------------|-----------|---------|---|-------------|
| Formula                                   |            |                          |           |         |   |             |
| Formula Weight                            |            |                          |           |         |   | 311.79      |
| Crystal System                            |            |                          |           |         |   | Triclinic   |
| Space group                               |            | P-1                      |           |         |   | (No. 2)     |
| a, b, c [Angstrom]                        | 6.3219(13) | 8.4477(17)               | 15.349(3) |         |   |             |
| alpha, beta, gamma [deg]                  | 102.22(3)  | 92.54(3)                 | 106.21(3) |         |   |             |
| V [Ang**3]                                |            |                          | 764.6(3)  |         |   |             |
| Z                                         |            |                          | 2         |         |   |             |
| D(calc) [g/cm**3]                         |            |                          | 1.354     |         |   |             |
| Mu(MoKa) [ /mm ]                          |            |                          | 0.251     |         |   |             |
| F(000)                                    |            |                          | 328       |         |   |             |
| Crystal Size [mm]                         |            | 0.50 x                   | 0.50 x    | 0.50    |   |             |
| Data Collection                           |            |                          |           |         |   |             |
| Temperature (K)                           |            |                          |           |         |   | 100         |
| Radiation [Angstrom]                      |            | MoKa                     |           |         |   | 0.71073     |
| Theta Min-Max [Deg]                       |            |                          |           |         |   | 3.3, 26.3   |
| Dataset                                   |            | -7: 7 ;                  | -10: 10 ; | -19: 18 |   |             |
| Tot., Uniq. Data, R(int)                  |            | 12756,                   | 3103,     | 0.032   |   |             |
| Observed data [I > 2.0 sigma(I)]          |            |                          |           | 2637    |   |             |
| Refinement                                |            |                          |           |         |   |             |
| Nref, Npar                                |            |                          |           |         |   | 3103, 208   |
| R, wR2, S                                 |            | 0.0333,                  | 0.0895,   | 1.04    |   |             |
| w = 1/[\s^2^(Fo^2^)+(0.0443P)^2^+0.3508P] |            | where P=(Fo^2^+2Fc^2^)/3 |           |         |   |             |
| Max. and Av. Shift/Error                  |            |                          |           |         |   | 0.00, 0.00  |
| Min. and Max. Resd. Dens. [e/Ang^3]       |            |                          |           |         |   | -0.22, 0.27 |

**Table 11 - Final Coordinates and Equivalent Isotropic Displacement Parameters of the non-Hydrogen atoms of 1H<sup>+</sup>.Cl<sup>-</sup>.**

| Atom | x           | y           | z           | U(eq) [Ang^2] |
|------|-------------|-------------|-------------|---------------|
| O8   | 0.47954(16) | 0.77556(13) | 0.20577(7)  | 0.0196(3)     |
| N1   | -0.1669(2)  | 0.28393(17) | 0.07394(9)  | 0.0213(4)     |
| C2   | 0.0337(3)   | 0.2981(2)   | 0.11194(10) | 0.0225(5)     |
| C3   | 0.1724(3)   | 0.45503(19) | 0.15523(10) | 0.0203(5)     |
| C4   | 0.1033(2)   | 0.59981(18) | 0.15950(9)  | 0.0159(4)     |
| C5   | -0.1055(2)  | 0.57852(19) | 0.11668(11) | 0.0213(4)     |
| C6   | -0.2385(3)  | 0.4187(2)   | 0.07477(11) | 0.0239(5)     |
| C7   | 0.2550(2)   | 0.77155(18) | 0.21420(10) | 0.0161(4)     |



|     |            |             |             |           |
|-----|------------|-------------|-------------|-----------|
| C9  | 0.2053(2)  | 0.92277(18) | 0.18447(10) | 0.0175(4) |
| C10 | 0.3217(2)  | 1.09351(18) | 0.24653(10) | 0.0170(4) |
| C11 | 0.2011(3)  | 1.17763(19) | 0.30335(10) | 0.0204(4) |
| C12 | 0.3038(3)  | 1.3349(2)   | 0.36069(11) | 0.0234(5) |
| C13 | 0.5290(3)  | 1.4096(2)   | 0.36181(11) | 0.0246(5) |
| C14 | 0.6509(3)  | 1.3288(2)   | 0.30536(11) | 0.0249(5) |
| C15 | 0.5481(3)  | 1.17135(19) | 0.24776(10) | 0.0210(5) |
| C16 | 0.2183(2)  | 0.77920(17) | 0.31292(10) | 0.0159(4) |
| C17 | 0.0134(2)  | 0.78082(19) | 0.34277(10) | 0.0201(4) |
| C18 | -0.0154(2) | 0.7946(2)   | 0.43279(11) | 0.0224(5) |
| C19 | 0.1578(3)  | 0.8024(2)   | 0.49389(11) | 0.0233(5) |
| C20 | 0.3600(3)  | 0.7986(2)   | 0.46460(11) | 0.0263(5) |
| C21 | 0.3910(3)  | 0.7885(2)   | 0.37467(11) | 0.0220(4) |
| C11 | 0.68004(6) | 0.88693(4)  | 0.04004(2)  | 0.0179(1) |

U(eq) = 1/3 of the trace of the orthogonalized U Tensor

**Table 12 - Hydrogen Atom Positions and Isotropic Displacement Parameters of 1H<sup>+</sup>.Cl<sup>-</sup>.**

| Atom | x         | y        | z          | U(iso) [Ang <sup>2</sup> ] |
|------|-----------|----------|------------|----------------------------|
| H1   | -0.254(3) | 0.185(3) | 0.0504(14) | 0.038(6)                   |
| H2   | 0.08070   | 0.19980  | 0.10910    | 0.0270                     |
| H3   | 0.31520   | 0.46510  | 0.18220    | 0.0240                     |
| H5   | -0.15580  | 0.67440  | 0.11650    | 0.0260                     |
| H6   | -0.38150  | 0.40420  | 0.04640    | 0.0290                     |
| H8   | 0.518(4)  | 0.806(3) | 0.1575(16) | 0.049(6)                   |
| H9A  | 0.25050   | 0.92380  | 0.12360    | 0.0210                     |
| H9B  | 0.04340   | 0.90560  | 0.18080    | 0.0210                     |
| H11  | 0.04660   | 1.12680  | 0.30290    | 0.0240                     |
| H12  | 0.21970   | 1.39080  | 0.39900    | 0.0280                     |
| H13  | 0.59990   | 1.51650  | 0.40140    | 0.0300                     |
| H14  | 0.80510   | 1.38070  | 0.30590    | 0.0300                     |
| H15  | 0.63260   | 1.11660  | 0.20910    | 0.0250                     |
| H17  | -0.10720  | 0.77240  | 0.30110    | 0.0240                     |
| H18  | -0.15430  | 0.79880  | 0.45270    | 0.0270                     |
| H19  | 0.13730   | 0.81020  | 0.55540    | 0.0280                     |
| H20  | 0.47860   | 0.80290  | 0.50610    | 0.0320                     |
| H21  | 0.53160   | 0.78800  | 0.35540    | 0.0260                     |

The Temperature Factor has the Form of Exp(-T) Where  
 $T = 8 * (\text{Pi} ** 2) * U * (\text{Sin}(\text{Theta}) / \text{Lambda}) ** 2$  for Isotropic Atoms

**Table 13 - (An)isotropic Displacement Parameters of 1H<sup>+</sup>.Cl<sup>-</sup>.**

| Atom | U(1,1) or U | U(2,2)    | U(3,3)    | U(2,3)    | U(1,3)     | U(1,2)    |
|------|-------------|-----------|-----------|-----------|------------|-----------|
| O8   | 0.0160(5)   | 0.0234(6) | 0.0220(6) | 0.0091(5) | 0.0054(4)  | 0.0069(4) |
| N1   | 0.0294(7)   | 0.0133(7) | 0.0165(7) | 0.0009(5) | 0.0039(5)  | 0.0007(6) |
| C2   | 0.0331(9)   | 0.0169(8) | 0.0211(8) | 0.0061(6) | 0.0096(7)  | 0.0108(7) |
| C3   | 0.0238(8)   | 0.0199(8) | 0.0188(8) | 0.0051(6) | 0.0038(6)  | 0.0085(6) |
| C4   | 0.0207(7)   | 0.0153(7) | 0.0123(7) | 0.0046(6) | 0.0051(6)  | 0.0050(6) |
| C5   | 0.0226(8)   | 0.0163(7) | 0.0243(8) | 0.0028(6) | -0.0002(6) | 0.0063(6) |
| C6   | 0.0246(8)   | 0.0201(8) | 0.0240(9) | 0.0036(7) | -0.0007(7) | 0.0034(6) |
| C7   | 0.0149(7)   | 0.0154(7) | 0.0190(8) | 0.0050(6) | 0.0025(6)  | 0.0054(6) |
| C9   | 0.0187(7)   | 0.0152(7) | 0.0183(8) | 0.0049(6) | 0.0009(6)  | 0.0042(6) |
| C10  | 0.0217(7)   | 0.0130(7) | 0.0169(7) | 0.0060(6) | 0.0008(6)  | 0.0043(6) |
| C11  | 0.0213(7)   | 0.0174(7) | 0.0229(8) | 0.0064(6) | 0.0032(6)  | 0.0051(6) |
| C12  | 0.0292(8)   | 0.0186(8) | 0.0227(8) | 0.0038(7) | 0.0055(7)  | 0.0079(7) |
| C13  | 0.0303(9)   | 0.0150(8) | 0.0238(9) | 0.0019(6) | -0.0017(7) | 0.0017(6) |
| C14  | 0.0219(8)   | 0.0201(8) | 0.0306(9) | 0.0087(7) | 0.0019(7)  | 0.0009(6) |
| C15  | 0.0225(8)   | 0.0184(8) | 0.0224(8) | 0.0064(6) | 0.0047(6)  | 0.0048(6) |
| C16  | 0.0182(7)   | 0.0096(6) | 0.0184(8) | 0.0028(6) | 0.0015(6)  | 0.0020(5) |

|     |           |           |           |           |            |           |
|-----|-----------|-----------|-----------|-----------|------------|-----------|
| C17 | 0.0167(7) | 0.0197(8) | 0.0212(8) | 0.0033(6) | -0.0005(6) | 0.0028(6) |
| C18 | 0.0173(7) | 0.0219(8) | 0.0258(9) | 0.0037(7) | 0.0065(6)  | 0.0029(6) |
| C19 | 0.0287(8) | 0.0234(8) | 0.0169(8) | 0.0049(6) | 0.0047(6)  | 0.0059(7) |
| C20 | 0.0247(8) | 0.0343(9) | 0.0219(8) | 0.0073(7) | -0.0009(6) | 0.0120(7) |
| C21 | 0.0188(7) | 0.0272(8) | 0.0225(8) | 0.0063(7) | 0.0036(6)  | 0.0102(6) |
| C11 | 0.0193(2) | 0.0150(2) | 0.0196(2) | 0.0043(1) | 0.0022(1)  | 0.0051(1) |

The Temperature Factor has the Form of  $\text{Exp}(-T)$  Where

$T = 8 * (\text{Pi}^{**2}) * U * (\text{Sin}(\text{Theta}) / \text{Lambda})^{**2}$  for Isotropic Atoms

$T = 2 * (\text{Pi}^{**2}) * \text{Sumij}(h(i) * h(j) * U(i, j) * \text{Astar}(i) * \text{Astar}(j))$ , for Anisotropic Atoms. Astar(i) are Reciprocal Axial Lengths and h(i) are the Reflection Indices.

**Table 14 - Bond Distances (Angstrom) of  $1\text{H}^+.\text{Cl}^-$ .**

|     |      |            |     |      |          |
|-----|------|------------|-----|------|----------|
| O8  | -C7  | 1.4228(17) | C17 | -C18 | 1.386(2) |
| O8  | -H8  | 0.86(2)    | C18 | -C19 | 1.388(2) |
| N1  | -C6  | 1.335(2)   | C19 | -C20 | 1.380(3) |
| N1  | -C2  | 1.335(2)   | C20 | -C21 | 1.391(2) |
| N1  | -H1  | 0.85(2)    | C2  | -H2  | 0.9500   |
| C2  | -C3  | 1.376(2)   | C3  | -H3  | 0.9500   |
| C3  | -C4  | 1.399(2)   | C5  | -H5  | 0.9500   |
| C4  | -C5  | 1.395(2)   | C6  | -H6  | 0.9500   |
| C4  | -C7  | 1.538(2)   | C9  | -H9A | 0.9900   |
| C5  | -C6  | 1.376(2)   | C9  | -H9B | 0.9900   |
| C7  | -C16 | 1.534(2)   | C11 | -H11 | 0.9500   |
| C7  | -C9  | 1.548(2)   | C12 | -H12 | 0.9500   |
| C9  | -C10 | 1.514(2)   | C13 | -H13 | 0.9500   |
| C10 | -C15 | 1.396(2)   | C14 | -H14 | 0.9500   |
| C10 | -C11 | 1.395(2)   | C15 | -H15 | 0.9500   |
| C11 | -C12 | 1.391(2)   | C17 | -H17 | 0.9500   |
| C12 | -C13 | 1.385(3)   | C18 | -H18 | 0.9500   |
| C13 | -C14 | 1.383(3)   | C19 | -H19 | 0.9500   |
| C14 | -C15 | 1.394(2)   | C20 | -H20 | 0.9500   |
| C16 | -C21 | 1.388(2)   | C21 | -H21 | 0.9500   |
| C16 | -C17 | 1.3957(19) |     |      |          |

**Table 15 - Bond Angles (Degrees) of  $1\text{H}^+.\text{Cl}^-$ .**

|     |      |      |            |     |      |      |            |
|-----|------|------|------------|-----|------|------|------------|
| C7  | -O8  | -H8  | 109.4(17)  | C17 | -C16 | -C21 | 118.80(15) |
| C2  | -N1  | -C6  | 122.12(15) | C16 | -C17 | -C18 | 120.47(13) |
| C6  | -N1  | -H1  | 119.1(15)  | C17 | -C18 | -C19 | 120.28(14) |
| C2  | -N1  | -H1  | 118.7(15)  | C18 | -C19 | -C20 | 119.52(15) |
| N1  | -C2  | -C3  | 120.01(16) | C19 | -C20 | -C21 | 120.37(17) |
| C2  | -C3  | -C4  | 120.04(17) | C16 | -C21 | -C20 | 120.54(17) |
| C5  | -C4  | -C7  | 123.52(13) | N1  | -C2  | -H2  | 120.00     |
| C3  | -C4  | -C7  | 118.78(13) | C3  | -C2  | -H2  | 120.00     |
| C3  | -C4  | -C5  | 117.65(14) | C2  | -C3  | -H3  | 120.00     |
| C4  | -C5  | -C6  | 120.04(15) | C4  | -C3  | -H3  | 120.00     |
| N1  | -C6  | -C5  | 120.10(16) | C4  | -C5  | -H5  | 120.00     |
| O8  | -C7  | -C4  | 108.78(12) | C6  | -C5  | -H5  | 120.00     |
| C4  | -C7  | -C16 | 106.95(12) | N1  | -C6  | -H6  | 120.00     |
| C9  | -C7  | -C16 | 110.58(12) | C5  | -C6  | -H6  | 120.00     |
| O8  | -C7  | -C16 | 107.40(11) | C7  | -C9  | -H9A | 109.00     |
| C4  | -C7  | -C9  | 112.16(12) | C7  | -C9  | -H9B | 109.00     |
| O8  | -C7  | -C9  | 110.79(12) | C10 | -C9  | -H9A | 109.00     |
| C7  | -C9  | -C10 | 113.92(12) | C10 | -C9  | -H9B | 109.00     |
| C9  | -C10 | -C11 | 119.80(13) | H9A | -C9  | -H9B | 108.00     |
| C11 | -C10 | -C15 | 118.54(15) | C10 | -C11 | -H11 | 120.00     |
| C9  | -C10 | -C15 | 121.65(13) | C12 | -C11 | -H11 | 119.00     |
| C10 | -C11 | -C12 | 120.95(17) | C11 | -C12 | -H12 | 120.00     |
| C11 | -C12 | -C13 | 119.80(17) | C13 | -C12 | -H12 | 120.00     |
| C12 | -C13 | -C14 | 120.06(16) | C12 | -C13 | -H13 | 120.00     |
| C13 | -C14 | -C15 | 120.18(18) | C14 | -C13 | -H13 | 120.00     |

|     |      |      |            |     |      |      |        |
|-----|------|------|------------|-----|------|------|--------|
| C10 | -C15 | -C14 | 120.45(16) | C13 | -C14 | -H14 | 120.00 |
| C7  | -C16 | -C17 | 120.95(13) | C15 | -C14 | -H14 | 120.00 |
| C7  | -C16 | -C21 | 120.24(13) | C10 | -C15 | -H15 | 120.00 |
| C14 | -C15 | -H15 | 120.00     | C20 | -C19 | -H19 | 120.00 |
| C16 | -C17 | -H17 | 120.00     | C19 | -C20 | -H20 | 120.00 |
| C18 | -C17 | -H17 | 120.00     | C21 | -C20 | -H20 | 120.00 |
| C17 | -C18 | -H18 | 120.00     | C16 | -C21 | -H21 | 120.00 |
| C19 | -C18 | -H18 | 120.00     | C20 | -C21 | -H21 | 120.00 |
| C18 | -C19 | -H19 | 120.00     |     |      |      |        |

**Table 16 - Torsion Angles (Degrees) of 1H<sup>+</sup>.Cl<sup>-</sup>.**

|     |      |      |      |             |
|-----|------|------|------|-------------|
| C6  | -N1  | -C2  | -C3  | 1.3(2)      |
| C2  | -N1  | -C6  | -C5  | -0.8(2)     |
| N1  | -C2  | -C3  | -C4  | 0.0(2)      |
| C2  | -C3  | -C4  | -C5  | -1.7(2)     |
| C2  | -C3  | -C4  | -C7  | 175.57(14)  |
| C3  | -C4  | -C5  | -C6  | 2.1(2)      |
| C7  | -C4  | -C5  | -C6  | -175.00(15) |
| C3  | -C4  | -C7  | -O8  | 35.22(18)   |
| C3  | -C4  | -C7  | -C9  | 158.12(13)  |
| C3  | -C4  | -C7  | -C16 | -80.49(16)  |
| C5  | -C4  | -C7  | -O8  | -147.70(14) |
| C5  | -C4  | -C7  | -C9  | -24.80(19)  |
| C5  | -C4  | -C7  | -C16 | 96.60(16)   |
| C4  | -C5  | -C6  | -N1  | -0.9(2)     |
| O8  | -C7  | -C9  | -C10 | -68.37(15)  |
| C4  | -C7  | -C9  | -C10 | 169.87(12)  |
| C16 | -C7  | -C9  | -C10 | 50.59(15)   |
| O8  | -C7  | -C16 | -C17 | 178.70(13)  |
| O8  | -C7  | -C16 | -C21 | 0.15(19)    |
| C4  | -C7  | -C16 | -C17 | -64.68(17)  |
| C4  | -C7  | -C16 | -C21 | 116.77(15)  |
| C9  | -C7  | -C16 | -C17 | 57.71(18)   |
| C9  | -C7  | -C16 | -C21 | -120.84(15) |
| C7  | -C9  | -C10 | -C11 | -106.20(16) |
| C7  | -C9  | -C10 | -C15 | 74.72(18)   |
| C9  | -C10 | -C11 | -C12 | -179.70(15) |
| C15 | -C10 | -C11 | -C12 | -0.6(2)     |
| C9  | -C10 | -C15 | -C14 | 179.80(15)  |
| C11 | -C10 | -C15 | -C14 | 0.7(2)      |
| C10 | -C11 | -C12 | -C13 | -0.1(2)     |
| C11 | -C12 | -C13 | -C14 | 0.7(3)      |
| C12 | -C13 | -C14 | -C15 | -0.6(3)     |
| C13 | -C14 | -C15 | -C10 | -0.1(2)     |
| C7  | -C16 | -C17 | -C18 | -177.41(15) |
| C21 | -C16 | -C17 | -C18 | 1.2(2)      |
| C7  | -C16 | -C21 | -C20 | 178.82(15)  |
| C17 | -C16 | -C21 | -C20 | 0.2(2)      |
| C16 | -C17 | -C18 | -C19 | -1.7(2)     |
| C17 | -C18 | -C19 | -C20 | 0.9(3)      |
| C18 | -C19 | -C20 | -C21 | 0.6(3)      |
| C19 | -C20 | -C21 | -C16 | -1.1(3)     |

**Table 17 - Contact Distances (Angstrom) of 1H<sup>+</sup>.Cl<sup>-</sup>.**

|     |        |            |     |        |            |
|-----|--------|------------|-----|--------|------------|
| C11 | .O8    | 3.0977(13) | C2  | .C11_e | 3.4015(19) |
| C11 | .N1_i  | 3.1400(16) | C2  | .C11_a | 3.4791(19) |
| C11 | .C2_i  | 3.4791(19) | C5  | .C17   | 3.474(2)   |
| C11 | .C11_m | 3.6764(9)  | C5  | .C11_f | 3.6247(17) |
| C11 | .N1_n  | 3.3884(16) | C6  | .C11_c | 3.3433(19) |
| C11 | .C2_o  | 3.4015(19) | C10 | .C17   | 3.463(2)   |
| C11 | .C6_n  | 3.3433(19) | C11 | .C16   | 3.431(2)   |

|     |        |            |     |        |          |
|-----|--------|------------|-----|--------|----------|
| C11 | .C5_l  | 3.6247(17) | C11 | .C2_g  | 3.518(2) |
| C11 | .H9B_l | 3.0300     | C11 | .C17   | 3.422(2) |
| C11 | .H15   | 2.9700     | C13 | .C21_g | 3.515(3) |
| C11 | .H9A   | 3.1200     | C15 | .O8    | 3.168(2) |
| C11 | .H1_i  | 2.40(2)    | C15 | .N1_i  | 3.437(2) |
| C11 | .H2_i  | 3.0600     | C16 | .C11   | 3.431(2) |
| C11 | .H5_l  | 2.7400     | C17 | .C11   | 3.422(2) |
| C11 | .H8    | 2.25(2)    | C17 | .C5    | 3.474(2) |
| C11 | .H1_n  | 2.82(2)    | C17 | .C10   | 3.463(2) |
| C11 | .H2_o  | 2.8800     | C18 | .C18_k | 3.591(2) |
| C11 | .H6_n  | 2.6800     | C20 | .C20_h | 3.285(2) |
| O8  | .C11   | 3.0977(13) | C21 | .C13_d | 3.515(3) |
| O8  | .C15   | 3.168(2)   | C4  | .H17   | 2.9400   |
| O8  | .H15   | 2.7600     | C5  | .H17   | 2.9600   |
| O8  | .H3    | 2.4800     | C5  | .H9B   | 2.6100   |
| O8  | .H21   | 2.2800     | C9  | .H5    | 2.6200   |
| N1  | .C11_a | 3.1400(16) | C9  | .H2_g  | 3.0900   |
| N1  | .C15_b | 3.437(2)   | C9  | .H17   | 2.9300   |
| N1  | .C11_c | 3.3884(16) | C10 | .H2_g  | 2.9800   |
| N1  | .H15_b | 2.9000     | C12 | .H20_h | 3.0100   |
| C2  | .C11_d | 3.518(2)   | C13 | .H20_h | 2.9700   |
| C14 | .H19_h | 3.0700     | H9B | .H11   | 2.3400   |
| C15 | .H8    | 3.05(2)    | H9B | .C17   | 2.8900   |
| C17 | .H11   | 3.0600     | H9B | .H5    | 2.0200   |
| C17 | .H21_j | 3.0800     | H9B | .C11_f | 3.0300   |
| C17 | .H9B   | 2.8900     | H9B | .H17   | 2.4500   |
| C18 | .H13_b | 2.8100     | H11 | .H19_k | 2.5400   |
| C18 | .H21_j | 3.0300     | H11 | .H9B   | 2.3400   |
| C20 | .H18_l | 3.0800     | H11 | .C17   | 3.0600   |
| C21 | .H18_l | 3.0400     | H13 | .C18_i | 2.8100   |
| C21 | .H13_d | 3.0400     | H13 | .C21_g | 3.0400   |
| H1  | .C11_a | 2.40(2)    | H13 | .H18_i | 2.4000   |
| H1  | .C11_c | 2.82(2)    | H15 | .C11   | 2.9700   |
| H2  | .C9_d  | 3.0900     | H15 | .H8    | 2.4600   |
| H2  | .C10_d | 2.9800     | H15 | .O8    | 2.7600   |
| H2  | .C11_a | 3.0600     | H15 | .N1_i  | 2.9000   |
| H2  | .C11_e | 2.8800     | H17 | .C4    | 2.9400   |
| H3  | .O8    | 2.4800     | H17 | .H9B   | 2.4500   |
| H5  | .C11_f | 2.7400     | H17 | .C5    | 2.9600   |
| H5  | .H9B   | 2.0200     | H17 | .C9    | 2.9300   |
| H5  | .C9    | 2.6200     | H17 | .H21_j | 2.4900   |
| H6  | .C11_c | 2.6800     | H18 | .H20_j | 2.5000   |
| H8  | .C11   | 2.25(2)    | H18 | .H21_j | 2.4000   |
| H8  | .C15   | 3.05(2)    | H18 | .H13_b | 2.4000   |
| H8  | .H9A   | 2.2800     | H18 | .C20_j | 3.0800   |
| H8  | .H15   | 2.4600     | H18 | .C21_j | 3.0400   |
| H9A | .C11   | 3.1200     | H19 | .C14_h | 3.0700   |
| H9A | .H8    | 2.2800     | H19 | .H11_k | 2.5400   |
| H9B | .C5    | 2.6100     | H20 | .H18_l | 2.5000   |
| H20 | .C12_h | 3.0100     | H21 | .C18_l | 3.0300   |
| H20 | .C13_h | 2.9700     | H21 | .H17_l | 2.4900   |
| H21 | .C17_l | 3.0800     | H21 | .O8    | 2.2800   |
| H21 | .H18_l | 2.4000     |     |        |          |

**Table 18 - Hydrogen Bonds (Angstrom, Deg) of 1H<sup>+</sup>.Cl<sup>-</sup>.**

|     |    |     |    |     |         |         |            |           |       |
|-----|----|-----|----|-----|---------|---------|------------|-----------|-------|
| N1  | -- | H1  | .. | C11 | 0.85(2) | 2.40(2) | 3.1400(16) | 144.7(18) | 1_445 |
| N1  | -- | H1  | .. | C11 | 0.85(2) | 2.82(2) | 3.3884(16) | 125.6(18) | 2_565 |
| O8  | -- | H8  | .. | C11 | 0.86(2) | 2.25(2) | 3.0977(13) | 170(2)    | .     |
| C5  | -- | H5  | .. | C11 | 0.9500  | 2.7400  | 3.6247(17) | 156.00    | 1_455 |
| C6  | -- | H6  | .. | C11 | 0.9500  | 2.6800  | 3.3433(19) | 128.00    | 2_565 |
| C21 | -- | H21 | .. | O8  | 0.9500  | 2.2800  | 2.663(2)   | 103.00    | .     |

**Translation of Symmetry Code to Equiv.Pos. in crystal  $1\text{H}^+\text{Cl}^-$ .**

a = [ 1445.00 ] = -1+x, -1+y, z  
 c = [ 2565.00 ] = -x, 1-y, -z  
 d = [ 1545.00 ] = x, -1+y, z  
 e = [ 2665.00 ] = 1-x, 1-y, -z  
 f = [ 1455.00 ] = -1+x, y, z  
 g = [ 1565.00 ] = x, 1+y, z  
 h = [ 2676.00 ] = 1-x, 2-y, 1-z  
 i = [ 1665.00 ] = 1+x, 1+y, z  
 k = [ 2576.00 ] = -x, 2-y, 1-z  
 l = [ 1655.00 ] = 1+x, y, z  
 m = [ 2675.00 ] = 1-x, 2-y, -z  
 o = [ 2665.00 ] = 1-x, 1-y, -z

**Table 19 - Crystal Data and Details of the Structure Determination of  $1\text{H}^+\text{NO}_3^-$ .**

| Crystal Data                                                   |            |            |         |             |
|----------------------------------------------------------------|------------|------------|---------|-------------|
| Formula                                                        |            | C19        | H18     | N O, N O3   |
| Formula Weight                                                 |            |            |         | 338.35      |
| Crystal System                                                 |            |            |         | Triclinic   |
| Space group                                                    |            | P-1        |         | (No. 2)     |
| a, b, c [Angstrom]                                             | 6.3168(13) | 8.1971(16) |         | 16.497(3)   |
| alpha, beta, gamma [deg]                                       | 100.78(3)  | 91.20(3)   |         | 100.44(3)   |
| V [Ang**3]                                                     |            |            |         | 823.9(3)    |
| Z                                                              |            |            |         | 2           |
| D(calc) [g/cm**3]                                              |            |            |         | 1.364       |
| Mu(MoKa) [ /mm ]                                               |            |            |         | 0.097       |
| F(000)                                                         |            |            |         | 356         |
| Crystal Size [mm]                                              |            | 0.10 x     | 0.10 x  | 0.10        |
| Data Collection                                                |            |            |         |             |
| Temperature (K)                                                |            |            |         | 173         |
| Radiation [Angstrom]                                           |            | MoKa       |         | 0.71073     |
| Theta Min-Max [Deg]                                            |            |            |         | 3.2, 25.6   |
| Dataset                                                        |            | 0: 7 ;     | -9: 9 ; | -20: 19     |
| Tot., Uniq. Data, R(int)                                       |            | 3025,      | 3025,   | 0.000       |
| Observed data [I > 2.0 sigma(I)]                               |            |            |         | 1900        |
| Refinement                                                     |            |            |         |             |
| Nref, Npar                                                     |            |            |         | 3025, 229   |
| R, wR2, S                                                      |            | 0.0501,    | 0.1181, | 1.04        |
| w = 1/[\s^2+(Fo^2)+(0.0419P)^2+0.2058P] where P=(Fo^2+2Fc^2)/3 |            |            |         |             |
| Max. and Av. Shift/Error                                       |            |            |         | 0.00, 0.00  |
| Min. and Max. Resd. Dens. [e/Ang^3]                            |            |            |         | -0.20, 0.40 |

**Table 20 - Final Coordinates and Equivalent Isotropic Displacement Parameters of the non-Hydrogen atoms of  $1\text{H}^+\text{NO}_3^-$ .**

| Atom | x         | y         | z           | U(eq) [Ang^2] |
|------|-----------|-----------|-------------|---------------|
| O8   | 0.5183(2) | 0.7422(2) | 0.28041(10) | 0.0239(5)     |
| N1   | 1.1319(3) | 1.1867(2) | 0.40682(13) | 0.0296(7)     |
| C2   | 0.9445(4) | 1.1930(3) | 0.36926(16) | 0.0279(8)     |
| C3   | 0.8164(4) | 1.0478(3) | 0.32621(15) | 0.0261(8)     |
| C4   | 0.8791(3) | 0.8918(3) | 0.32166(14) | 0.0198(7)     |
| C5   | 1.0737(4) | 0.8919(3) | 0.36282(15) | 0.0284(8)     |
| C6   | 1.1978(4) | 1.0398(3) | 0.40482(16) | 0.0345(9)     |
| C7   | 0.7396(3) | 0.7324(3) | 0.26980(14) | 0.0198(7)     |
| C9   | 0.7887(4) | 0.5692(3) | 0.29487(14) | 0.0225(8)     |
| C10  | 0.6715(3) | 0.4084(3) | 0.24073(15) | 0.0214(8)     |
| C11  | 0.7805(4) | 0.3178(3) | 0.18068(16) | 0.0290(8)     |
| C12  | 0.6785(4) | 0.1682(3) | 0.13052(16) | 0.0348(9)     |
| C13  | 0.4636(4) | 0.1067(3) | 0.13890(17) | 0.0350(9)     |
| C14  | 0.3530(4) | 0.1935(3) | 0.19855(18) | 0.0347(9)     |
| C15  | 0.4556(4) | 0.3431(3) | 0.24908(16) | 0.0297(9)     |

|     |           |           |             |           |
|-----|-----------|-----------|-------------|-----------|
| C16 | 0.7804(3) | 0.7289(3) | 0.17834(14) | 0.0186(7) |
| C17 | 0.9874(4) | 0.7401(3) | 0.15099(15) | 0.0270(8) |
| C18 | 1.0214(4) | 0.7282(3) | 0.06761(16) | 0.0336(9) |
| C19 | 0.8504(4) | 0.7083(3) | 0.01081(16) | 0.0322(9) |
| C20 | 0.6449(4) | 0.6970(3) | 0.03773(15) | 0.0314(9) |
| C21 | 0.6086(4) | 0.7057(3) | 0.12072(15) | 0.0275(8) |
| O1  | 0.4844(3) | 0.7674(2) | 0.44791(11) | 0.0355(6) |
| O2  | 0.2222(3) | 0.5517(2) | 0.43076(12) | 0.0405(7) |
| O3  | 0.4109(3) | 0.6354(2) | 0.54817(11) | 0.0373(7) |
| N2  | 0.3706(3) | 0.6492(3) | 0.47541(12) | 0.0258(7) |

U(eq) = 1/3 of the trace of the orthogonalized U Tensor

**Table 21 - Hydrogen Atom Positions and Isotropic Displacement Parameters of 1H<sup>+</sup>.NO<sub>3</sub><sup>-</sup>.**

| Atom | x       | y       | z        | U(iso) [Ang <sup>2</sup> ] |
|------|---------|---------|----------|----------------------------|
| H1   | 1.23330 | 1.30120 | 0.43910  | 0.084(11)                  |
| H2   | 0.89990 | 1.29850 | 0.37240  | 0.0340                     |
| H3   | 0.68420 | 1.05360 | 0.29940  | 0.0310                     |
| H5   | 1.12140 | 0.78810 | 0.36180  | 0.0340                     |
| H6   | 1.33050 | 1.03800 | 0.43250  | 0.0410                     |
| H8   | 0.49740 | 0.74220 | 0.34080  | 0.062(9)                   |
| H9A  | 0.94570 | 0.57140 | 0.29310  | 0.0270                     |
| H9B  | 0.74930 | 0.56900 | 0.35260  | 0.0270                     |
| H11  | 0.92810 | 0.35990 | 0.17400  | 0.0350                     |
| H12  | 0.75640 | 0.10790 | 0.09040  | 0.0420                     |
| H13  | 0.39200 | 0.00540 | 0.10390  | 0.0420                     |
| H14  | 0.20560 | 0.15040 | 0.20500  | 0.0420                     |
| H15  | 0.37770 | 0.40150 | 0.28980  | 0.0360                     |
| H17  | 1.10660 | 0.75600 | 0.18960  | 0.0320                     |
| H18  | 1.16370 | 0.73380 | 0.04930  | 0.0400                     |
| H19  | 0.87470 | 0.70250 | -0.04620 | 0.0390                     |
| H20  | 0.52650 | 0.68320 | -0.00100 | 0.0380                     |
| H21  | 0.46550 | 0.69570 | 0.13840  | 0.0330                     |

The Temperature Factor has the Form of Exp(-T) Where  
 $T = 8 * (\text{Pi}^{**2}) * U * (\text{Sin}(\text{Theta}) / \text{Lambda})^{**2}$  for Isotropic Atoms

**Table 22 - (An)isotropic Displacement Parameters of 1H<sup>+</sup>.NO<sub>3</sub><sup>-</sup>.**

| Atom | U(1,1) or U | U(2,2)     | U(3,3)     | U(2,3)     | U(1,3)      | U(1,2)      |
|------|-------------|------------|------------|------------|-------------|-------------|
| Atom | U(1,1) or U | U(2,2)     | U(3,3)     | U(2,3)     | U(1,3)      | U(1,2)      |
| O8   | 0.0186(8)   | 0.0307(10) | 0.0240(10) | 0.0076(8)  | 0.0023(7)   | 0.0062(7)   |
| N1   | 0.0357(12)  | 0.0219(12) | 0.0290(13) | 0.0032(10) | -0.0036(10) | 0.0021(10)  |
| C2   | 0.0322(14)  | 0.0207(14) | 0.0331(15) | 0.0076(12) | 0.0064(12)  | 0.0078(11)  |
| C3   | 0.0251(13)  | 0.0263(15) | 0.0282(15) | 0.0063(12) | -0.0009(11) | 0.0075(11)  |
| C4   | 0.0222(12)  | 0.0202(13) | 0.0177(13) | 0.0046(11) | 0.0016(10)  | 0.0048(10)  |
| C5   | 0.0299(14)  | 0.0216(14) | 0.0333(16) | 0.0031(12) | -0.0102(12) | 0.0073(11)  |
| C6   | 0.0350(15)  | 0.0276(16) | 0.0388(17) | 0.0051(13) | -0.0129(13) | 0.0039(12)  |
| C7   | 0.0154(11)  | 0.0231(13) | 0.0225(14) | 0.0069(11) | -0.0006(10) | 0.0054(10)  |
| C9   | 0.0257(13)  | 0.0211(13) | 0.0211(13) | 0.0078(11) | -0.0018(10) | 0.0023(10)  |
| C10  | 0.0241(12)  | 0.0185(13) | 0.0241(14) | 0.0094(11) | -0.0003(11) | 0.0057(10)  |
| C11  | 0.0286(13)  | 0.0241(14) | 0.0353(16) | 0.0098(13) | 0.0040(12)  | 0.0029(11)  |
| C12  | 0.0465(17)  | 0.0263(15) | 0.0308(16) | 0.0030(13) | 0.0039(13)  | 0.0075(13)  |
| C13  | 0.0437(17)  | 0.0212(14) | 0.0357(17) | 0.0041(13) | -0.0084(14) | -0.0024(12) |
| C14  | 0.0274(14)  | 0.0268(15) | 0.0481(18) | 0.0096(14) | -0.0027(13) | -0.0012(12) |
| C15  | 0.0278(14)  | 0.0275(15) | 0.0362(16) | 0.0106(13) | 0.0037(12)  | 0.0064(12)  |
| C16  | 0.0217(12)  | 0.0134(12) | 0.0199(13) | 0.0016(10) | -0.0014(10) | 0.0036(9)   |
| C17  | 0.0204(13)  | 0.0379(15) | 0.0211(14) | 0.0054(12) | -0.0017(10) | 0.0018(11)  |
| C18  | 0.0229(13)  | 0.0447(17) | 0.0300(16) | 0.0049(14) | 0.0043(12)  | 0.0005(12)  |
| C19  | 0.0376(15)  | 0.0380(16) | 0.0196(15) | 0.0043(13) | 0.0042(12)  | 0.0043(12)  |

|     |            |            |            |            |             |            |
|-----|------------|------------|------------|------------|-------------|------------|
| C20 | 0.0316(14) | 0.0398(16) | 0.0224(15) | 0.0045(13) | -0.0061(12) | 0.0084(12) |
| C21 | 0.0216(13) | 0.0336(15) | 0.0283(15) | 0.0071(12) | -0.0009(11) | 0.0070(11) |
| O1  | 0.0407(11) | 0.0319(10) | 0.0309(11) | 0.0100(9)  | -0.0012(8)  | -0.0049(8) |
| O2  | 0.0308(10) | 0.0300(11) | 0.0563(13) | 0.0046(10) | -0.0160(9)  | 0.0001(8)  |
| O3  | 0.0453(11) | 0.0430(12) | 0.0278(11) | 0.0109(9)  | 0.0039(9)   | 0.0153(9)  |
| N2  | 0.0267(11) | 0.0311(13) | 0.0231(13) | 0.0058(11) | 0.0007(10)  | 0.0141(10) |

=====  
The Temperature Factor has the Form of  $\text{Exp}(-T)$  Where  
 $T = 8 * (\text{Pi}^{**2}) * U * (\text{Sin}(\text{Theta}) / \text{Lambda})^{**2}$  for Isotropic Atoms  
 $T = 2 * (\text{Pi}^{**2}) * \text{Sumij}(h(i) * h(j) * U(i, j) * \text{Astar}(i) * \text{Astar}(j))$ , for  
Anisotropic Atoms. Astar(i) are Reciprocal Axial Lengths and  
h(i) are the Reflection Indices.

**Table 23 - Bond Distances (Angstrom) of  $1\text{H}^+.\text{NO}_3^-$ .**

|     |      |          |     |      |          |
|-----|------|----------|-----|------|----------|
| O8  | -C7  | 1.427(2) | C16 | -C21 | 1.390(3) |
| O8  | -H8  | 1.0100   | C16 | -C17 | 1.385(3) |
| O1  | -N2  | 1.260(3) | C17 | -C18 | 1.385(4) |
| O2  | -N2  | 1.241(3) | C18 | -C19 | 1.381(4) |
| O3  | -N2  | 1.252(3) | C19 | -C20 | 1.374(4) |
| N1  | -C6  | 1.339(3) | C20 | -C21 | 1.384(3) |
| N1  | -C2  | 1.338(3) | C2  | -H2  | 0.9500   |
| N1  | -H1  | 1.0800   | C3  | -H3  | 0.9500   |
| C2  | -C3  | 1.374(4) | C5  | -H5  | 0.9500   |
| C3  | -C4  | 1.395(3) | C6  | -H6  | 0.9500   |
| C4  | -C7  | 1.533(3) | C9  | -H9B | 0.9900   |
| C4  | -C5  | 1.392(3) | C9  | -H9A | 0.9900   |
| C5  | -C6  | 1.372(4) | C11 | -H11 | 0.9500   |
| C7  | -C9  | 1.552(3) | C12 | -H12 | 0.9500   |
| C7  | -C16 | 1.532(3) | C13 | -H13 | 0.9500   |
| C9  | -C10 | 1.504(3) | C14 | -H14 | 0.9500   |
| C10 | -C11 | 1.395(3) | C15 | -H15 | 0.9500   |
| C10 | -C15 | 1.392(3) | C17 | -H17 | 0.9500   |
| C11 | -C12 | 1.384(4) | C18 | -H18 | 0.9500   |
| C12 | -C13 | 1.379(4) | C19 | -H19 | 0.9500   |
| C13 | -C14 | 1.382(4) | C20 | -H20 | 0.9500   |
| C14 | -C15 | 1.388(4) | C21 | -H21 | 0.9500   |

**Table 24 - Bond Angles (Degrees) of  $1\text{H}^+.\text{NO}_3^-$ .**

|    |     |      |            |     |      |      |            |
|----|-----|------|------------|-----|------|------|------------|
| C7 | -O8 | -H8  | 105.00     | C10 | -C15 | -C14 | 120.7(2)   |
| C2 | -N1 | -C6  | 121.3(2)   | C7  | -C16 | -C21 | 120.33(19) |
| C6 | -N1 | -H1  | 119.00     | C17 | -C16 | -C21 | 118.8(2)   |
| C2 | -N1 | -H1  | 120.00     | C7  | -C16 | -C17 | 120.75(19) |
| O1 | -N2 | -O2  | 119.8(2)   | C16 | -C17 | -C18 | 120.3(2)   |
| O1 | -N2 | -O3  | 118.2(2)   | C17 | -C18 | -C19 | 120.6(2)   |
| O2 | -N2 | -O3  | 122.0(2)   | C18 | -C19 | -C20 | 119.2(2)   |
| N1 | -C2 | -C3  | 120.4(2)   | C19 | -C20 | -C21 | 120.7(2)   |
| C2 | -C3 | -C4  | 120.4(2)   | C16 | -C21 | -C20 | 120.4(2)   |
| C3 | -C4 | -C5  | 116.9(2)   | N1  | -C2  | -H2  | 120.00     |
| C5 | -C4 | -C7  | 123.4(2)   | C3  | -C2  | -H2  | 120.00     |
| C3 | -C4 | -C7  | 119.67(19) | C4  | -C3  | -H3  | 120.00     |
| C4 | -C5 | -C6  | 120.9(2)   | C2  | -C3  | -H3  | 120.00     |
| N1 | -C6 | -C5  | 120.0(2)   | C4  | -C5  | -H5  | 120.00     |
| C9 | -C7 | -C16 | 109.90(19) | C6  | -C5  | -H5  | 120.00     |
| C4 | -C7 | -C16 | 108.92(19) | C5  | -C6  | -H6  | 120.00     |
| O8 | -C7 | -C9  | 110.16(19) | N1  | -C6  | -H6  | 120.00     |
| O8 | -C7 | -C16 | 107.55(17) | C7  | -C9  | -H9A | 109.00     |
| C4 | -C7 | -C9  | 111.74(18) | C7  | -C9  | -H9B | 109.00     |
| O8 | -C7 | -C4  | 108.47(18) | C10 | -C9  | -H9A | 109.00     |
| C7 | -C9 | -C10 | 114.0(2)   | C10 | -C9  | -H9B | 109.00     |

|     |      |      |          |     |      |      |        |
|-----|------|------|----------|-----|------|------|--------|
| C9  | -C10 | -C11 | 120.0(2) | H9A | -C9  | -H9B | 108.00 |
| C11 | -C10 | -C15 | 117.8(2) | C12 | -C11 | -H11 | 119.00 |
| C9  | -C10 | -C15 | 122.2(2) | C10 | -C11 | -H11 | 119.00 |
| C10 | -C11 | -C12 | 121.5(2) | C11 | -C12 | -H12 | 120.00 |
| C11 | -C12 | -C13 | 119.9(2) | C13 | -C12 | -H12 | 120.00 |
| C12 | -C13 | -C14 | 119.6(2) | C12 | -C13 | -H13 | 120.00 |
| C13 | -C14 | -C15 | 120.5(2) | C14 | -C13 | -H13 | 120.00 |
| C15 | -C14 | -H14 | 120.00   | C19 | -C18 | -H18 | 120.00 |
| C13 | -C14 | -H14 | 120.00   | C20 | -C19 | -H19 | 120.00 |
| C14 | -C15 | -H15 | 120.00   | C18 | -C19 | -H19 | 120.00 |
| C10 | -C15 | -H15 | 120.00   | C19 | -C20 | -H20 | 120.00 |
| C16 | -C17 | -H17 | 120.00   | C21 | -C20 | -H20 | 120.00 |
| C18 | -C17 | -H17 | 120.00   | C16 | -C21 | -H21 | 120.00 |
| C17 | -C18 | -H18 | 120.00   | C20 | -C21 | -H21 | 120.00 |

**Table 25 - Torsion Angles (Degrees) of  $1\text{H}^+\text{NO}_3^-$ .**

|     |      |      |      |             |
|-----|------|------|------|-------------|
| C6  | -N1  | -C2  | -C3  | -1.2(4)     |
| C2  | -N1  | -C6  | -C5  | 0.8(4)      |
| N1  | -C2  | -C3  | -C4  | 0.5(4)      |
| C2  | -C3  | -C4  | -C5  | 0.4(4)      |
| C2  | -C3  | -C4  | -C7  | -177.0(2)   |
| C3  | -C4  | -C5  | -C6  | -0.8(4)     |
| C7  | -C4  | -C5  | -C6  | 176.5(2)    |
| C3  | -C4  | -C7  | -O8  | -39.2(3)    |
| C3  | -C4  | -C7  | -C9  | -160.8(2)   |
| C3  | -C4  | -C7  | -C16 | 77.6(2)     |
| C5  | -C4  | -C7  | -O8  | 143.6(2)    |
| C5  | -C4  | -C7  | -C9  | 22.0(3)     |
| C5  | -C4  | -C7  | -C16 | -99.6(3)    |
| C4  | -C5  | -C6  | -N1  | 0.2(4)      |
| O8  | -C7  | -C9  | -C10 | 64.8(2)     |
| C4  | -C7  | -C9  | -C10 | -174.57(18) |
| C16 | -C7  | -C9  | -C10 | -53.5(2)    |
| O8  | -C7  | -C16 | -C17 | 172.2(2)    |
| O8  | -C7  | -C16 | -C21 | -11.1(3)    |
| C4  | -C7  | -C16 | -C17 | 54.8(3)     |
| C4  | -C7  | -C16 | -C21 | -128.5(2)   |
| C9  | -C7  | -C16 | -C17 | -67.9(3)    |
| C9  | -C7  | -C16 | -C21 | 108.8(2)    |
| C7  | -C9  | -C10 | -C11 | 102.7(3)    |
| C7  | -C9  | -C10 | -C15 | -78.5(3)    |
| C9  | -C10 | -C11 | -C12 | 179.1(2)    |
| C15 | -C10 | -C11 | -C12 | 0.3(4)      |
| C9  | -C10 | -C15 | -C14 | -179.4(2)   |
| C11 | -C10 | -C15 | -C14 | -0.6(4)     |
| C10 | -C11 | -C12 | -C13 | 0.7(4)      |
| C11 | -C12 | -C13 | -C14 | -1.3(4)     |
| C12 | -C13 | -C14 | -C15 | 1.0(4)      |
| C13 | -C14 | -C15 | -C10 | -0.1(4)     |
| C7  | -C16 | -C17 | -C18 | 176.7(2)    |
| C21 | -C16 | -C17 | -C18 | 0.0(4)      |
| C7  | -C16 | -C21 | -C20 | -177.9(2)   |
| C17 | -C16 | -C21 | -C20 | -1.1(4)     |
| C16 | -C17 | -C18 | -C19 | 1.3(4)      |
| C17 | -C18 | -C19 | -C20 | -1.3(4)     |
| C18 | -C19 | -C20 | -C21 | 0.1(4)      |
| C19 | -C20 | -C21 | -C16 | 1.1(4)      |

**Table 26 - Contact Distances (Angstrom) of  $1\text{H}^+\text{NO}_3^-$ .**

|    |       |          |    |       |        |
|----|-------|----------|----|-------|--------|
| O1 | .C6_a | 3.282(3) | O2 | .H1_m | 2.1000 |
| O1 | .C7   | 3.371(3) | O2 | .H2_m | 2.6500 |
| O1 | .C4   | 3.418(3) | O3 | .H1_n | 2.2100 |



|     |        |          |     |        |          |
|-----|--------|----------|-----|--------|----------|
| O1  | .C5_a  | 3.330(3) | O3  | .H2_o  | 2.4700   |
| O1  | .O8    | 2.748(2) | O3  | .H9B_p | 2.6400   |
| O1  | .C6_n  | 3.105(3) | O3  | .H6_n  | 2.8300   |
| O2  | .N1_m  | 2.892(2) | O8  | .H5_a  | 2.9200   |
| O2  | .O3_i  | 3.049(3) | O8  | .H3    | 2.5400   |
| O2  | .C2_m  | 3.113(3) | O8  | .H15   | 2.8100   |
| O3  | .N2_i  | 2.889(3) | O8  | .H21   | 2.3100   |
| O3  | .O3_i  | 2.895(3) | N1  | .O3_c  | 3.000(3) |
| O3  | .N1_n  | 3.000(3) | N1  | .O2_b  | 2.892(2) |
| O3  | .C6_n  | 3.250(3) | N2  | .O3_i  | 2.889(3) |
| O3  | .C2_o  | 3.071(3) | N2  | .H1_m  | 2.7700   |
| O3  | .O2_i  | 3.049(3) | N2  | .H8    | 2.5800   |
| O3  | .C15_p | 3.397(3) | N2  | .H5_a  | 2.9300   |
| O8  | .O1    | 2.748(2) | N2  | .H1_n  | 2.7700   |
| O8  | .C15   | 3.165(3) | C2  | .O2_b  | 3.113(3) |
| O1  | .H5_a  | 2.7200   | C2  | .C10_d | 3.597(4) |
| O1  | .H8    | 1.7500   | C2  | .O3_e  | 3.071(3) |
| O1  | .H9B   | 2.8400   | C3  | .C11_d | 3.586(4) |
| O1  | .H6_a  | 2.6300   | C4  | .O1    | 3.418(3) |
| O1  | .H6_n  | 2.4200   | C5  | .C17   | 3.479(4) |
| O1  | .H1_n  | 2.7500   | C5  | .O1_f  | 3.330(3) |
| O2  | .H8    | 2.7700   | C6  | .O1_c  | 3.105(3) |
| O2  | .H5_a  | 2.5900   | C6  | .O3_c  | 3.250(3) |
| O2  | .H9A_a | 2.8800   | C6  | .O1_f  | 3.282(3) |
| O2  | .H15   | 2.7100   | C7  | .O1    | 3.371(3) |
| C10 | .C21   | 3.484(4) | C20 | .H20_h | 3.0500   |
| C10 | .C2_g  | 3.597(4) | C21 | .H18_a | 3.0900   |
| C11 | .C16   | 3.377(4) | C21 | .H13_d | 3.0700   |
| C11 | .C17   | 3.599(4) | H1  | .N2_c  | 2.7700   |
| C11 | .C3_g  | 3.586(4) | H1  | .O2_b  | 2.1000   |
| C13 | .C21_g | 3.531(4) | H1  | .N2_b  | 2.7700   |
| C15 | .O8    | 3.165(3) | H1  | .O1_c  | 2.7500   |
| C15 | .O3_i  | 3.397(3) | H1  | .O3_c  | 2.2100   |
| C16 | .C11   | 3.377(4) | H2  | .C10_d | 2.9500   |
| C17 | .C5    | 3.479(4) | H2  | .O3_e  | 2.4700   |
| C17 | .C11   | 3.599(4) | H2  | .C9_d  | 2.9400   |
| C20 | .C20_h | 3.404(4) | H2  | .O2_b  | 2.6500   |
| C21 | .C13_d | 3.531(4) | H3  | .O8    | 2.5400   |
| C21 | .C10   | 3.484(4) | H5  | .C9    | 2.5800   |
| C3  | .H8    | 2.9700   | H5  | .H8_k  | 2.4900   |
| C4  | .H17   | 2.8000   | H5  | .O1_f  | 2.7200   |
| C5  | .H9A   | 2.6300   | H5  | .O2_f  | 2.5900   |
| C5  | .H17   | 2.8900   | H5  | .O8_k  | 2.9200   |
| C5  | .H9B   | 3.0100   | H5  | .N2_f  | 2.9300   |
| C9  | .H17   | 3.0700   | H5  | .H9A   | 2.0400   |
| C9  | .H2_g  | 2.9400   | H6  | .O1_f  | 2.6300   |
| C9  | .H5    | 2.5800   | H6  | .O1_c  | 2.4200   |
| C10 | .H2_g  | 2.9500   | H6  | .O3_c  | 2.8300   |
| C12 | .H20_h | 3.0300   | H8  | .N2    | 2.5800   |
| C13 | .H20_h | 3.0900   | H8  | .C3    | 2.9700   |
| C17 | .H9A   | 2.9300   | H8  | .O2    | 2.7700   |
| C18 | .H21_k | 3.0900   | H8  | .O1    | 1.7500   |
| C18 | .H13_j | 2.9200   | H8  | .H9B   | 2.3400   |
| H8  | .H5_a  | 2.4900   | H15 | .H9B   | 2.5800   |
| H9A | .H11   | 2.3500   | H17 | .C9    | 3.0700   |
| H9A | .H5    | 2.0400   | H17 | .C4    | 2.8000   |
| H9A | .O2_f  | 2.8800   | H17 | .C5    | 2.8900   |
| H9A | .C5    | 2.6300   | H17 | .H21_k | 2.5400   |
| H9A | .C17   | 2.9300   | H17 | .H9A   | 2.5900   |
| H9A | .H17   | 2.5900   | H18 | .C21_k | 3.0900   |
| H9B | .O3_i  | 2.6400   | H18 | .H21_k | 2.4800   |
| H9B | .O1    | 2.8400   | H18 | .H13_j | 2.4200   |
| H9B | .C5    | 3.0100   | H18 | .H20_k | 2.5300   |
| H9B | .H15   | 2.5800   | H19 | .H11_l | 2.4900   |

|     |        |        |     |        |        |
|-----|--------|--------|-----|--------|--------|
| H9B | .H8    | 2.3400 | H20 | .H18_a | 2.5300 |
| H11 | .H9A   | 2.3500 | H20 | .C20_h | 3.0500 |
| H11 | .H19_l | 2.4900 | H20 | .C12_h | 3.0300 |
| H13 | .C21_g | 3.0700 | H20 | .C13_h | 3.0900 |
| H13 | .C18_m | 2.9200 | H21 | .H18_a | 2.4800 |
| H13 | .H18_m | 2.4200 | H21 | .O8    | 2.3100 |
| H15 | .O8    | 2.8100 | H21 | .C18_a | 3.0900 |
| H15 | .O2    | 2.7100 | H21 | .H17_a | 2.5400 |

**Table 27 - Hydrogen Bonds (Angstrom, Deg) of  $1\text{H}^+\text{NO}_3^-$ .**

|     |        |       |        |        |          |        |       |
|-----|--------|-------|--------|--------|----------|--------|-------|
| N1  | -- H1  | .. O2 | 1.0800 | 2.1000 | 2.892(2) | 129.00 | 1_665 |
| N1  | -- H1  | .. O3 | 1.0800 | 2.2100 | 3.000(3) | 129.00 | 2_776 |
| O8  | -- H8  | .. O1 | 1.0100 | 1.7500 | 2.748(2) | 173.00 | .     |
| C2  | -- H2  | .. O3 | 0.9500 | 2.4700 | 3.071(3) | 121.00 | 2_676 |
| C5  | -- H5  | .. O2 | 0.9500 | 2.5900 | 3.462(3) | 153.00 | 1_655 |
| C6  | -- H6  | .. O1 | 0.9500 | 2.4200 | 3.105(3) | 129.00 | 2_776 |
| C21 | -- H21 | .. O8 | 0.9500 | 2.3100 | 2.681(3) | 103.00 | .     |

**Translation of Symmetry Code to Equiv.Pos. in crystal of  $1\text{H}^+\text{NO}_3^-$ .**

|   |               |                 |
|---|---------------|-----------------|
| a | = [ 1455.00 ] | = -1+x, y, z    |
| b | = [ 1665.00 ] | = 1+x, 1+y, z   |
| c | = [ 2776.00 ] | = 2-x, 2-y, 1-z |
| d | = [ 1565.00 ] | = x, 1+y, z     |
| e | = [ 2676.00 ] | = 1-x, 2-y, 1-z |
| f | = [ 1655.00 ] | = 1+x, y, z     |
| g | = [ 1545.00 ] | = x, -1+y, z    |
| h | = [ 2665.00 ] | = 1-x, 1-y, -z  |
| i | = [ 2666.00 ] | = 1-x, 1-y, 1-z |
| l | = [ 2765.00 ] | = 2-x, 1-y, -z  |
| m | = [ 1445.00 ] | = -1+x, -1+y, z |
| p | = [ 2666.00 ] | = 1-x, 1-y, 1-z |
